# Supplementary material for: T Cells Enhance Stem-Like Properties and Conditional Malignancy in Gliomas
Source: PLoS One. 2010 Jun 7;5(6):e10974. doi: 10.1371/journal.pone.0010974 (PMC2881867; doi:10.1371/journal.pone.0010974)
Supplement: Table S1 — Probesets for human GBM analysis. Entire lists of 1581 vaccine-altered, 202 EGFR- and SHH-related, 163 cytokine/immune modulator, and 944 progenitor cell/differentiation probesets (HG133+2 chip) used in microarray analyses in Figures 1, 6, S1, S2, S3, S4, and S6, can be found in Table S1. (0.13 MB XLS) [file pone.0010974.s005.xls]

## Sheet: Sheet1
Vaccine-altered hu	EGFR-, SHH-related	cytokine/immune Modulators	Progenitor/differentiation
206443_at	207163_s_at	1405_i_at	121_at
211791_s_at	203684_s_at	1552798_a_at	1552649_a_at
1558009_at	203685_at	1554984_a_at	1552651_a_at
211372_s_at	207004_at	1555759_a_at	1552973_at
205242_at	207005_s_at	1556815_at	1553045_at
201984_s_at	232210_at	1558779_at	1553492_a_at
229341_at	232614_at	1558780_a_at	1553802_a_at
204560_at	237837_at	1559452_a_at	1553812_at
223734_at	244035_at	1560213_at	1553813_s_at
206310_at	205681_at	1563319_at	1554036_at
210363_s_at	1553088_a_at	200853_at	1554037_a_at
235281_x_at	1553096_s_at	200904_at	1554364_at
214538_x_at	1555372_at	200905_x_at	1554365_a_at
1558010_s_at	1558143_a_at	201137_s_at	1554874_at
210738_s_at	208536_s_at	202487_s_at	1555056_at
1569969_a_at	222343_at	202948_at	1555353_at
208603_s_at	225606_at	203084_at	1555814_a_at
210167_s_at	1555826_at	203085_s_at	1555821_a_at
220037_s_at	202094_at	203290_at	1555836_at
239491_at	202095_s_at	203932_at	1555837_s_at
236726_at	210334_x_at	204053_x_at	1555952_at
229484_at	1557905_s_at	204054_at	1555953_at
241652_x_at	1565868_at	204655_at	1555997_s_at
227057_at	204489_s_at	204670_x_at	1556006_s_at
205161_s_at	204490_s_at	204731_at	1556007_s_at
217281_x_at	209835_x_at	204780_s_at	1556309_s_at
218219_s_at	210916_s_at	204781_s_at	1556689_a_at
224999_at	212014_x_at	204806_x_at	1557395_at
222144_at	212063_at	204881_s_at	1557403_s_at
203111_s_at	216056_at	204924_at	1557543_at
205577_at	216062_at	205346_at	1557626_at
1553194_at	217523_at	205403_at	1557718_at
220029_at	234411_x_at	205436_s_at	1557905_s_at
213456_at	234418_x_at	205671_s_at	1558215_s_at
213121_at	1565483_at	206271_at	1558305_at
238080_at	1565484_x_at	206313_at	1558544_at
215297_at	201983_s_at	206943_at	1559235_a_at
211215_x_at	201984_s_at	207168_s_at	1559344_at
210244_at	210984_x_at	207334_s_at	1559394_a_at
207583_at	211550_at	207446_at	1559425_at
205819_at	211551_at	208306_x_at	1559618_at
221926_s_at	211607_x_at	208322_s_at	1559833_at
230481_at	224999_at	208729_x_at	1560074_at
214203_s_at	232120_at	208812_x_at	1560100_at
218711_s_at	232541_at	208894_at	1560133_at
214961_at	232925_at	208944_at	1560752_at
211214_s_at	233044_at	208991_at	1560893_at
238429_at	237938_at	208992_s_at	1560974_s_at
208471_at	243327_at	209140_x_at	1560995_s_at
1564097_at	209588_at	209312_x_at	1562028_at
201983_s_at	209589_s_at	209480_at	1562454_at
218745_x_at	210651_s_at	209728_at	1562603_at
1566948_at	211165_x_at	209823_x_at	1562675_at
209557_s_at	233699_at	209908_s_at	1562823_at
236143_at	234158_at	210166_at	1563252_at
1560905_at	209189_at	210176_at	1563253_s_at
1553605_a_at	203913_s_at	210514_x_at	1563454_at
214584_x_at	203914_x_at	210747_at	1564237_at
216015_s_at	211548_s_at	210982_s_at	1564836_at
221672_s_at	211549_s_at	211142_x_at	1565265_at
244171_at	242733_at	211372_s_at	1565483_at
1552944_a_at	202794_at	211528_x_at	1565484_x_at
215021_s_at	201464_x_at	211529_x_at	1565734_at
1555179_at	201465_s_at	211530_x_at	1565735_at
204864_s_at	201466_s_at	211654_x_at	1565868_at
1555185_x_at	213281_at	211656_x_at	1566093_at
240614_at	1552263_at	211711_s_at	1566094_at
1554438_at	1552264_a_at	211799_x_at	1566096_x_at
216949_s_at	1562283_at	211911_x_at	1566171_at
206440_at	208351_s_at	211990_at	1566427_at
219059_s_at	212271_at	211991_s_at	1566428_at
243752_s_at	224620_at	212205_at	1566540_at
1557795_s_at	224621_at	212206_s_at	1566541_at
207055_at	229847_at	212524_x_at	1566596_at
232062_at	242106_at	212525_s_at	1566597_at
205460_at	206040_s_at	212671_s_at	1567359_at
201902_s_at	211499_s_at	212998_x_at	1567575_at
211520_s_at	211500_at	212999_x_at	1567576_at
1555164_at	212046_x_at	213344_s_at	1567906_at
1555694_a_at	210477_x_at	213537_at	1568126_at
227764_at	210671_x_at	213831_at	1568448_at
209070_s_at	226046_at	213911_s_at	1568449_at
201044_x_at	226048_at	213932_x_at	1568695_s_at
1553565_s_at	243280_at	214459_x_at	1568732_at
1554660_a_at	201710_at	214500_at	1568872_at
235549_at	209239_at	214501_s_at	1568920_at
204717_s_at	239876_at	215193_x_at	1569001_at
219545_at	207535_s_at	215313_x_at	1569002_x_at
1556069_s_at	209636_at	215536_at	1569042_at
242786_at	211524_at	215561_s_at	1569052_at
214390_s_at	1553694_a_at	215666_at	1569111_at
1553396_a_at	1569021_at	215669_at	1569263_at
230323_s_at	1569022_a_at	215719_x_at	1569439_at
232570_s_at	1569587_at	215874_at	1569477_at
211196_at	1569588_x_at	215875_at	1569638_at
1554685_a_at	213070_at	216252_x_at	1570383_at
222939_s_at	226094_at	216526_x_at	1570439_at
233452_at	235792_x_at	216946_at	1570471_at
233724_at	241905_at	217001_x_at	1570482_at
224856_at	204484_at	217323_at	1570486_at
37512_at	215129_at	217362_x_at	160020_at
1553147_at	204369_at	217436_x_at	200059_s_at
204555_s_at	215212_at	217456_x_at	200665_s_at
236279_at	212688_at	217478_s_at	200780_x_at
1556355_x_at	217620_s_at	217492_s_at	200784_s_at
1553158_at	203879_at	217650_x_at	200785_s_at
1556364_at	211230_s_at	218445_at	200813_s_at
220049_s_at	206369_s_at	220146_at	200815_s_at
219195_at	206370_at	220406_at	200816_s_at
208608_s_at	1568629_s_at	220407_s_at	200900_s_at
242061_at	207105_s_at	220832_at	200901_s_at
206618_at	229392_s_at	220936_s_at	200951_s_at
233146_at	1559282_at	221060_s_at	200952_s_at
1555725_a_at	207002_s_at	221491_x_at	200953_s_at
207594_s_at	207943_x_at	221875_x_at	200981_x_at
1555680_a_at	209318_x_at	221978_at	201087_at
216581_at	244836_at	222176_at	201162_at
210424_s_at	202789_at	222952_s_at	201163_s_at
232133_at	216551_x_at	223750_s_at	201289_at
240551_at	201469_s_at	223751_x_at	201333_s_at
222315_at	214853_s_at	223834_at	201334_s_at
1562076_at	1558210_at	223903_at	201335_s_at
228978_at	1558211_s_at	224301_x_at	201349_at
219432_at	1565080_at	224341_x_at	201390_s_at
205403_at	1565082_x_at	224793_s_at	201392_s_at
1554835_a_at	213324_at	224967_at	201393_s_at
216239_at	221281_at	225245_x_at	201416_at
213683_at	221284_s_at	225289_at	201417_at
204374_s_at	237103_at	225363_at	201418_s_at
219277_s_at	208991_at	226840_at	201464_x_at
215575_at	208992_s_at	226878_at	201465_s_at
237421_at	225289_at	227085_at	201466_s_at
240942_at	235680_at	227469_at	201508_at
211125_x_at	243213_at	228121_at	201551_s_at
204389_at	205792_at	228213_at	201552_at
241600_at	1552848_a_at	228784_at	201553_s_at
232390_at	1559618_at	229336_at	201590_x_at
234213_at	1560317_s_at	229560_at	201697_s_at
220868_s_at	1564836_at	229593_at	201700_at
1569154_a_at	1566190_at	229968_at	201803_at
214279_s_at	1566191_at	232068_s_at	201877_s_at
224018_s_at	1569052_at	233254_x_at	201907_x_at
219201_s_at	1569342_at	233314_at	201908_at
217154_s_at	201392_s_at	233820_at	201983_s_at
222561_at	201393_s_at	235680_at	201984_s_at
204936_at	202035_s_at	236203_at	202035_s_at
217071_s_at	202036_s_at	236419_at	202036_s_at
228459_at	202037_s_at	236561_at	202037_s_at
229374_at	202265_at	237522_at	202067_s_at
205429_s_at	202410_x_at	237826_at	202068_s_at
244649_at	203627_at	238487_at	202087_s_at
203838_s_at	203628_at	238900_at	202178_at
244593_at	205201_at	239021_at	202196_s_at
210971_s_at	205425_at	239605_x_at	202212_at
207001_x_at	205426_s_at	239975_at	202332_at
233856_at	206646_at	240182_at	202360_at
222560_at	207034_s_at	240188_at	202410_x_at
206070_s_at	207042_at	240948_at	202431_s_at
229502_at	207230_at	240964_at	202443_x_at
207562_at	207586_at	242145_at	202445_s_at
204380_s_at	208057_s_at	242622_x_at	202454_s_at
210349_at	208441_at	243213_at	202545_at
1561617_at	208449_s_at	244485_at	202692_s_at
202873_at	209540_at		202701_at
219782_s_at	209541_at		202704_at
1569634_at	209542_x_at		202716_at
205208_at	209756_s_at		202718_at
1561343_a_at	209757_s_at		202769_at
214361_s_at	210673_x_at		202770_s_at
231740_at	210881_s_at		202827_s_at
219929_s_at	211024_s_at		202828_s_at
219319_at	211377_x_at		202853_s_at
221136_at	211577_s_at		202855_s_at
209793_at	212287_at		202856_s_at
203977_at	213971_s_at		202935_s_at
237137_at	215420_at		202936_s_at
230978_at	218629_at		203084_at
240746_s_at	223761_at		203085_s_at
1555136_at	226364_at		203218_at
214318_s_at	227336_at		203220_s_at
221357_at	227526_at		203221_at
206071_s_at	228184_at		203222_s_at
237215_s_at	228361_at		203230_at
215325_x_at	228413_s_at		203237_s_at
204388_s_at	228537_at		203238_s_at
212695_at	229358_at		203304_at
211790_s_at	230019_s_at		203338_at
1557326_at	231315_at		203379_at
222124_at	231510_at		203424_s_at
206444_at	233717_x_at		203425_s_at
208258_s_at	234355_s_at		203426_s_at
237623_at	234376_at		203451_at
207640_x_at	235582_at		203525_s_at
1562316_at	236263_at		203526_s_at
207838_x_at	236934_at		203527_s_at
205700_at	237377_at		203575_at
228701_at	237881_at		203592_s_at
1553410_a_at	238544_at		203627_at
203997_at	239689_at		203628_at
219364_at	239939_at		203697_at
219422_at	241870_at		203698_s_at
231957_s_at	242026_at		203705_s_at
1562938_at			203706_s_at
239566_at			203821_at
1556190_s_at			203843_at
232606_at			203851_at
233744_at			203987_at
238244_at			204051_s_at
224460_s_at			204052_s_at
208206_s_at			204053_x_at
221439_at			204054_at
234721_s_at			204089_x_at
243208_x_at			204129_at
1569693_at			204131_s_at
1552924_a_at			204132_s_at
217199_s_at			204369_at
1561471_at			204420_at
226435_at			204431_at
213495_s_at			204432_at
1554355_a_at			204451_at
234045_x_at			204452_s_at
211003_x_at			204489_s_at
206221_at			204490_s_at
234658_at			204501_at
1554704_at			204602_at
218806_s_at			204686_at
1566158_at			204712_at
215915_at			204813_at
207729_at			204825_at
1566433_at			204832_s_at
1554668_a_at			204863_s_at
239470_at			204864_s_at
216436_at			204872_at
1554152_a_at			204913_s_at
226034_at			204914_s_at
244484_at			204915_s_at
207174_at			204948_s_at
211782_at			205023_at
217546_at			205024_s_at
233377_at			205077_s_at
213643_s_at			205078_at
239684_at			205187_at
205404_at			205188_s_at
1561281_a_at			205247_at
205279_s_at			205254_x_at
212741_at			205255_x_at
228848_at			205289_at
221414_s_at			205290_s_at
212392_s_at			205302_at
1557807_a_at			205320_at
240300_at			205340_at
241214_at			205421_at
209641_s_at			205430_at
235700_at			205431_s_at
205868_s_at			205479_s_at
202977_s_at			205574_x_at
237930_at			205578_at
234636_at			205606_at
222717_at			205646_s_at
218207_s_at			205648_at
204485_s_at			205792_at
239608_at			205805_s_at
217669_s_at			205990_s_at
239141_at			206017_at
231127_at			206075_s_at
233793_at			206099_at
206831_s_at			206122_at
201971_s_at			206136_at
233084_s_at			206176_at
213817_at			206213_at
224840_at			206228_at
1561249_a_at			206229_x_at
235740_at			206237_s_at
229005_at			206248_at
203407_at			206343_s_at
224551_s_at			206382_s_at
216271_x_at			206399_x_at
240047_at			206458_s_at
222123_s_at			206459_s_at
1560898_at			206472_s_at
1562562_at			206562_s_at
209368_at			206619_at
209611_s_at			206634_at
201169_s_at			206655_s_at
1559450_at			206657_s_at
221628_s_at			206725_x_at
211056_s_at			206737_at
240454_at			206742_at
232480_at			206794_at
229961_x_at			206796_at
1561939_at			206802_at
209952_s_at			206923_at
233250_x_at			207059_at
233597_at			207092_at
224221_s_at			207113_s_at
1561879_at			207147_at
230677_at			207163_s_at
1558760_at			207233_s_at
233846_at			207309_at
205876_at			207310_s_at
1559930_at			207336_at
1555678_at			207345_at
212257_s_at			207468_s_at
224566_at			207558_s_at
227771_at			207595_s_at
236174_at			207612_at
206220_s_at			207632_at
242771_at			207633_s_at
1559035_a_at			207639_at
1553962_s_at			207678_s_at
211050_x_at			207679_at
206842_at			207680_x_at
221525_at			207785_s_at
205867_at			207851_s_at
203790_s_at			207865_s_at
1560671_at			207866_at
236383_at			207867_at
203296_s_at			207921_x_at
215649_s_at			207923_x_at
1554607_at			207924_x_at
1560698_a_at			207945_s_at
210355_at			207957_s_at
201367_s_at			208015_at
239447_at			208060_at
226471_at			208210_at
238663_x_at			208216_at
1553340_s_at			208230_s_at
240680_at			208231_at
243224_at			208232_x_at
1554853_at			208241_at
241611_s_at			208292_at
241277_x_at			208417_at
1559766_at			208441_at
243327_at			208468_at
203295_s_at			208533_at
214929_s_at			208559_at
203294_s_at			208570_at
238763_at			208574_at
220594_at			208606_s_at
237115_at			208711_s_at
221578_at			208712_at
238228_at			208774_at
1553929_at			208865_at
200879_s_at			208866_at
1553995_a_at			208867_s_at
212768_s_at			208991_at
242553_at			208992_s_at
201211_s_at			209081_s_at
217687_at			209082_s_at
205328_at			209097_s_at
220687_at			209098_s_at
243464_at			209099_x_at
212575_at			209101_at
226891_at			209151_x_at
1556224_a_at			209152_s_at
220909_at			209153_s_at
214757_at			209220_at
1557034_s_at			209355_s_at
208363_s_at			209398_at
1561328_at			209409_at
231963_at			209410_s_at
238342_at			209468_at
224078_at			209540_at
242984_at			209541_at
224324_at			209542_x_at
238408_at			209543_s_at
207124_s_at			209552_at
204553_x_at			209560_s_at
213724_s_at			209590_at
1554758_a_at			209591_s_at
205846_at			209630_s_at
214369_s_at			209677_at
237811_at			209678_s_at
208951_at			209685_s_at
210066_s_at			209736_at
231243_s_at			209767_s_at
1553365_at			209768_s_at
217246_s_at			209769_s_at
231811_at			209784_s_at
1560557_at			209835_x_at
203030_s_at			209842_at
205768_s_at			209843_s_at
1563009_at			209864_at
224223_s_at			209892_at
208011_at			209893_s_at
211620_x_at			209920_at
231358_at			209945_s_at
211507_s_at			209946_at
1566168_at			209999_x_at
241341_at			210000_s_at
206582_s_at			210001_s_at
235150_at			210038_at
1555609_a_at			210039_s_at
223992_x_at			210095_s_at
207925_at			210164_at
220117_at			210214_s_at
1556898_at			210220_at
200671_s_at			210248_at
1569205_at			210259_s_at
220888_s_at			210427_x_at
222253_s_at			210433_at
201452_at			210515_at
206527_at			210523_at
217223_s_at			210570_x_at
202099_s_at			210655_s_at
205897_at			210741_at
229880_at			210756_s_at
244783_at			210764_s_at
210558_at			210770_s_at
208748_s_at			210776_x_at
215570_s_at			210881_s_at
211534_x_at			210916_s_at
220279_at			210930_s_at
211923_s_at			210937_s_at
237657_at			210938_at
237886_at			210948_s_at
241926_s_at			210984_x_at
211447_s_at			210993_s_at
210067_at			210999_s_at
242066_at			211000_s_at
205614_x_at			211057_at
220001_at			211062_s_at
1552923_a_at			211176_s_at
209950_s_at			211259_s_at
1557910_at			211260_at
224062_x_at			211312_s_at
238419_at			211437_at
1561484_at			211518_s_at
231240_at			211547_s_at
205410_s_at			211550_at
1554334_a_at			211551_at
1560042_at			211559_s_at
209800_at			211577_s_at
204438_at			211607_x_at
205316_at			211668_s_at
1569551_at			211711_s_at
224237_at			211753_s_at
219586_at			211823_s_at
206637_at			211858_x_at
233573_s_at			211958_at
214863_at			211959_at
207399_at			211974_x_at
209437_s_at			212014_x_at
1559020_a_at			212063_at
227929_at			212072_s_at
228737_at			212073_at
221031_s_at			212075_s_at
1558839_at			212143_s_at
1554321_a_at			212195_at
203641_s_at			212196_at
1554757_a_at			212226_s_at
242921_at			212230_at
215488_at			212260_at
217006_x_at			212261_at
234555_at			212273_x_at
238492_at			212349_at
223821_s_at			212377_s_at
206099_at			212667_at
241422_at			212759_s_at
219139_s_at			212761_at
240027_at			212762_s_at
215581_s_at			212769_at
201048_x_at			212770_at
209493_at			212849_at
1565347_s_at			213012_at
1555972_s_at			213086_s_at
238976_at			213093_at
241502_x_at			213281_at
1552758_at			213305_s_at
231452_at			213337_s_at
207370_at			213425_at
215099_s_at			213456_at
214763_at			213503_x_at
214738_s_at			213518_at
1564318_at			213522_s_at
205317_s_at			213578_at
1554311_a_at			213655_at
231817_at			213665_at
1563027_at			213668_s_at
204498_s_at			213707_s_at
208879_x_at			213721_at
240258_at			213722_at
241401_at			213728_at
234918_at			213730_x_at
225372_at			213731_s_at
219516_at			213732_at
242647_at			213809_x_at
1558604_a_at			213811_x_at
1556667_at			213860_x_at
242591_at			213910_at
1569240_at			213917_at
1557898_at			214083_at
238743_at			214157_at
244196_at			214172_x_at
212514_x_at			214178_s_at
214646_at			214247_s_at
1552806_a_at			214321_at
226794_at			214401_at
242929_at			214528_s_at
222643_s_at			214548_x_at
1559481_at			214633_at
219313_at			214688_at
217202_s_at			214716_at
220256_s_at			214881_s_at
208518_s_at			214933_at
215863_at			215042_at
226912_at			215194_at
244768_at			215195_at
209456_s_at			215212_at
209824_s_at			215248_at
210896_s_at			215260_s_at
203032_s_at			215310_at
234574_at			215517_at
236359_at			215520_at
239384_at			215638_at
1554113_a_at			215685_s_at
226442_at			215712_s_at
1555467_a_at			215732_s_at
210148_at			215742_at
228648_at			215768_at
216592_at			215776_at
1553694_a_at			215802_at
206203_at			215868_x_at
1557673_at			215884_s_at
217205_at			216035_x_at
238557_at			216037_x_at
204238_s_at			216056_at
201116_s_at			216059_at
243062_at			216062_at
205822_s_at			216161_at
216000_at			216162_at
209848_s_at			216199_s_at
243409_at			216268_s_at
203543_s_at			216511_s_at
234361_at			216552_x_at
212196_at			216572_at
237590_at			216587_s_at
219970_at			216647_at
1565733_at			216753_at
226576_at			216766_at
210449_x_at			216810_at
227763_at			216836_s_at
1555785_a_at			216930_at
1561309_x_at			216933_x_at
223661_at			216976_s_at
231246_at			216997_x_at
208325_s_at			217005_at
243042_at			217040_x_at
204554_at			217057_s_at
230662_at			217058_at
207761_s_at			217103_at
200648_s_at			217173_s_at
219610_at			217174_s_at
210063_at			217183_at
232893_at			217279_x_at
218500_at			217399_s_at
216205_s_at			217492_s_at
233021_at			217523_at
201159_s_at			217673_x_at
1569383_s_at			217685_at
230543_at			217686_at
221295_at			217689_at
204888_s_at			217691_x_at
218822_s_at			217729_s_at
224339_s_at			217903_at
217197_x_at			218122_s_at
201538_s_at			218468_s_at
204379_s_at			218469_at
208917_x_at			218512_at
216294_s_at			218629_at
216971_s_at			218665_at
204429_s_at			218737_at
206042_x_at			218751_s_at
222534_s_at			218759_at
237869_at			218764_at
221287_at			218819_at
243735_at			218832_x_at
237313_at			218902_at
239530_at			218941_at
240177_at			218985_at
217818_s_at			219201_s_at
213756_s_at			219297_at
207374_at			219312_s_at
1556284_at			219546_at
219733_s_at			219568_x_at
241066_at			219683_at
201401_s_at			219764_at
234068_s_at			219853_at
205369_x_at			219889_at
1555426_a_at			219908_at
219527_at			219993_at
205164_at			220203_at
221106_at			220204_s_at
244574_at			220256_s_at
228851_s_at			220277_at
240223_at			220356_at
240567_at			220444_at
206707_x_at			220557_s_at
224410_s_at			220561_at
219093_at			220640_at
233026_s_at			220777_at
215833_s_at			220846_s_at
238132_at			221012_s_at
1560118_at			221029_s_at
241601_at			221113_s_at
207326_at			221289_at
219430_at			221332_at
210188_at			221455_s_at
220773_s_at			221519_at
207764_s_at			221557_s_at
241485_at			221558_s_at
221082_s_at			221609_s_at
230884_s_at			221615_at
1556194_a_at			221673_s_at
244561_at			221835_at
232053_x_at			221889_at
215275_at			221990_at
216584_at			222015_at
221308_at			222022_at
1553907_a_at			222054_at
205826_at			222076_at
228288_at			222077_s_at
234941_s_at			222086_s_at
1559635_at			222176_at
208190_s_at			222219_s_at
217179_x_at			222239_s_at
203736_s_at			222350_at
241999_at			222523_at
238312_s_at			222695_s_at
214128_at			222696_at
207732_s_at			222729_at
1569022_a_at			222756_s_at
208947_s_at			222863_at
207993_s_at			222912_at
222758_s_at			223024_at
207526_s_at			223025_s_at
210816_s_at			223121_s_at
216149_at			223122_s_at
204921_at			223131_s_at
222878_s_at			223132_s_at
214433_s_at			223308_s_at
1569944_at			223508_at
223631_s_at			223520_s_at
214906_x_at			223525_at
203811_s_at			223537_s_at
207311_at			223689_at
218995_s_at			223709_s_at
214564_s_at			223865_at
223994_s_at			223869_at
1555300_a_at			223987_at
217465_at			224013_s_at
237434_x_at			224022_x_at
207151_at			224176_s_at
1553446_at			224178_s_at
228263_at			224199_at
224799_at			224259_at
206564_at			224325_at
1553237_x_at			224337_s_at
1554614_a_at			224498_x_at
227944_at			224534_at
211540_s_at			224548_at
1557470_at			224658_x_at
1560739_a_at			224889_at
1561829_at			224891_at
234070_at			224922_at
210652_s_at			224982_at
223921_s_at			224999_at
221562_s_at			225144_at
230277_at			225170_at
205446_s_at			225219_at
209727_at			225223_at
213023_at			225225_at
219608_s_at			225289_at
239620_at			225332_at
231918_s_at			225406_at
211871_x_at			225745_at
225800_at			225756_at
208351_s_at			225781_at
211502_s_at			225982_at
215881_x_at			226066_at
210537_s_at			226101_at
203990_s_at			226213_at
1558722_at			226281_at
244204_at			226335_at
244677_at			226847_at
219572_at			226853_at
211825_s_at			226858_at
208046_at			226888_at
211355_x_at			226913_s_at
244871_s_at			226920_at
238861_at			227130_s_at
234106_s_at			227250_at
226672_s_at			227336_at
224746_at			227377_at
1552264_a_at			227405_s_at
220500_s_at			227432_s_at
202498_s_at			227469_at
234514_at			227474_at
1558504_at			227557_at
213461_at			227684_at
205045_at			227760_at
215984_s_at			227798_at
203799_at			227817_at
205770_at			227824_at
211805_s_at			227882_at
239056_at			227965_at
242904_x_at			228015_s_at
1554339_a_at			228038_at
1559954_s_at			228052_x_at
227417_at			228081_at
1564307_a_at			228173_at
229247_at			228284_at
213470_s_at			228340_at
209105_at			228358_at
210667_s_at			228413_s_at
208399_s_at			228698_at
212906_at			228795_at
222422_s_at			228834_at
1558768_at			228980_at
234935_at			229103_at
243698_at			229113_s_at
222907_x_at			229154_at
212475_at			229212_at
211561_x_at			229216_s_at
232085_at			229274_at
205459_s_at			229322_at
205461_at			229419_at
226390_at			229489_at
213232_at			229540_at
231874_at			229591_at
206112_at			229639_s_at
234650_at			229774_at
205388_at			229924_s_at
244225_x_at			230299_s_at
244553_at			230437_s_at
210625_s_at			230508_at
204290_s_at			230643_at
206665_s_at			230649_at
211715_s_at			230982_at
208744_x_at			230990_at
228678_at			231142_at
218706_s_at			231145_at
215820_x_at			231183_s_at
209736_at			231222_at
204770_at			231273_x_at
1554782_at			231490_at
233567_at			231548_at
211299_s_at			231666_at
1553673_at			231685_at
233153_at			231743_at
222802_at			231777_at
232296_s_at			231778_at
206917_at			231798_at
201383_s_at			231808_at
208459_s_at			231873_at
1558784_at			231898_x_at
234973_at			231920_s_at
229164_s_at			232060_at
221449_s_at			232120_at
222519_s_at			232205_at
1557970_s_at			232324_x_at
241752_at			232406_at
242281_at			232465_at
1555464_at			232522_at
211242_x_at			232541_at
212102_s_at			232544_at
228360_at			232622_at
1552481_s_at			232688_at
218931_at			232837_at
204362_at			232925_at
202064_s_at			232947_at
238546_at			233044_at
209683_at			233254_x_at
228712_at			233275_at
202887_s_at			233301_at
208763_s_at			233314_at
205530_at			233411_at
219987_at			233494_at
217777_s_at			233498_at
1568830_at			233575_s_at
225807_at			233594_at
215137_at			233606_at
220266_s_at			233620_at
244001_at			233621_s_at
216125_s_at			233629_at
1553842_at			233674_at
212246_at			233689_at
202150_s_at			233717_x_at
222145_at			233899_x_at
210743_s_at			234089_at
200604_s_at			234129_at
211573_x_at			234194_at
227842_at			234354_x_at
230196_x_at			234411_x_at
239439_at			234418_x_at
205716_at			234474_x_at
203134_at			234541_s_at
206546_at			234542_at
203220_s_at			234544_at
213022_s_at			234609_at
225575_at			234619_at
231158_x_at			234646_at
242569_at			234843_s_at
216008_s_at			234967_at
213986_s_at			235195_at
202046_s_at			235275_at
203339_at			235283_at
202476_s_at			235370_at
209333_at			235392_at
216607_s_at			235451_at
210269_s_at			235464_at
213515_x_at			235485_at
209270_at			235491_at
213978_at			235526_at
202327_s_at			235680_at
210248_at			235721_at
216476_at			235726_at
231586_at			235765_at
223693_s_at			235795_at
202670_at			235851_s_at
200769_s_at			236094_at
207528_s_at			236216_at
220613_s_at			236434_at
1559881_s_at			236443_at
223527_s_at			236459_at
1555294_a_at			236460_at
215910_s_at			236498_s_at
211000_s_at			236499_at
204552_at			236584_at
211354_s_at			236678_at
203340_s_at			236764_at
234759_at			236934_at
219600_s_at			237052_x_at
210442_at			237181_at
219399_at			237377_at
215560_x_at			237472_at
1557370_s_at			237473_at
229576_s_at			237881_at
1567032_s_at			237907_at
201848_s_at			237919_at
1559975_at			237938_at
202069_s_at			237951_at
1558173_a_at			237989_at
1554868_s_at			238142_at
221428_s_at			238208_at
225758_s_at			238210_at
219723_x_at			238285_at
225182_at			238393_at
218811_at			238516_at
210622_x_at			238544_at
1553301_a_at			239011_at
212390_at			239037_at
234456_at			239132_at
232675_s_at			239228_at
1556962_at			239235_at
226432_at			239260_at
222442_s_at			239261_s_at
208872_s_at			239309_at
211272_s_at			239367_at
209799_at			239426_at
222470_s_at			239454_at
232815_at			239526_x_at
1561042_at			239795_at
212851_at			239920_at
222089_s_at			239923_at
238618_at			239931_at
1558289_at			239939_at
204431_at			240221_at
204482_at			240260_at
1557749_at			240297_at
1565254_s_at			240331_at
231917_at			240337_at
1555815_a_at			240393_at
1554747_a_at			240524_x_at
237081_at			240555_at
239976_at			240713_s_at
200848_at			240786_at
209819_at			240789_at
214976_at			240911_at
215263_at			240964_at
1560550_at			241057_x_at
214726_x_at			241097_at
219199_at			241122_s_at
204233_s_at			241141_at
225373_at			241205_at
206113_s_at			241250_at
230083_at			241460_at
210336_x_at			241542_at
218780_at			241556_at
229316_at			241574_s_at
207890_s_at			241581_at
1556747_a_at			241610_x_at
217620_s_at			241618_at
210077_s_at			241691_at
217224_at			241736_at
233831_at			241907_at
237465_at			241921_x_at
204942_s_at			242025_at
208950_s_at			242138_at
204294_at			242151_at
229785_at			242174_at
213375_s_at			242320_at
207047_s_at			242467_at
209629_s_at			242578_x_at
1554691_a_at			242622_x_at
210064_s_at			242657_at
1557124_at			242940_x_at
226690_at			242975_s_at
207549_x_at			243002_at
235627_at			243029_at
225905_s_at			243193_at
1562665_at			243213_at
219955_at			243215_at
222356_at			243243_at
228872_at			243255_at
202554_s_at			243275_at
1554229_at			243327_at
223225_s_at			243338_at
209921_at			243362_s_at
200883_at			243363_at
221425_s_at			243424_at
211801_x_at			243583_at
1560339_s_at			244089_at
211170_s_at			244223_at
212266_s_at			244328_x_at
235044_at			244388_at
206782_s_at			244419_at
235024_at			244446_at
34063_at			244503_at
204149_s_at			244524_at
216833_x_at			244857_at
204745_x_at			32137_at
223725_at			34697_at
212515_s_at			35160_at
231858_x_at			37170_at
219251_s_at			38037_at
234393_at			38918_at
212150_at			40837_at
216629_at			45653_at
231944_at			49049_at
230148_at			49051_g_at
214107_x_at			57532_at
1554465_s_at			59644_at
237227_at			71933_at
232167_at
226094_at
211230_s_at
222088_s_at
216885_s_at
1568695_s_at
228341_at
1564911_at
200987_x_at
1556545_at
239897_at
89948_at
215850_s_at
238137_at
243569_at
214925_s_at
217390_x_at
225428_s_at
1555078_at
202930_s_at
232076_at
226205_at
207449_s_at
64440_at
227296_at
208033_s_at
212373_at
204564_at
208785_s_at
201511_at
207563_s_at
213292_s_at
210817_s_at
238523_at
217860_at
218455_at
233933_s_at
212708_at
215843_s_at
238900_at
206622_at
215008_at
212444_at
222947_at
1562107_at
240022_at
1562684_at
239730_at
205422_s_at
223278_at
244466_at
211029_x_at
238808_at
208525_s_at
205947_s_at
202409_at
232856_at
230033_at
203108_at
244042_x_at
206633_at
229125_at
1556496_a_at
226145_s_at
226473_at
207155_at
230650_at
230935_at
205980_s_at
240065_at
231639_at
1563505_at
231380_at
232507_at
238623_at
236594_at
224997_x_at
236849_at
224422_x_at
241895_at
232956_at
1554340_a_at
230822_at
206172_at
1569186_at
229158_at
237048_at
1561314_at
204802_at
1554018_at
1569411_at
1558428_at
238310_at
244759_x_at
1563589_at
244825_at
202796_at
227662_at
207144_s_at
234134_at
1560109_s_at
235454_at
241062_at
224389_s_at
233016_at
209172_s_at
239618_at
234513_at
223327_x_at
1562698_x_at
234903_at
221226_s_at
1562736_at
241312_at
219438_at
241209_at
205289_at
232246_at
232475_at
1569270_at
220786_s_at
201416_at
223843_at
241169_at
1570191_at
236100_at
221092_at
231381_at
240797_at
243756_at
239045_at
241473_at
237466_s_at
244635_s_at
1561239_at
213592_at
224244_s_at
231993_at
232960_at
217323_at
1552841_s_at
240042_at
1569677_a_at
233291_at
1553706_at
211598_x_at
206515_at
232446_at
1560187_at
204416_x_at
1556471_at
229518_at
228564_at
207039_at
211165_x_at
229755_x_at
219464_at
203131_at
1553441_at
237820_at
205654_at
238756_at
228326_at
237303_at
239975_at
244095_at
207060_at
1559880_at
1566764_at
1569941_at
244615_x_at
244612_at
205249_at
201141_at
206007_at
207523_at
206960_at
210747_at
232755_at
238780_s_at
244718_at
244032_at
215885_at
224112_at
242637_at
1560007_at
235367_at
1553769_at
219511_s_at
1562595_at
232887_at
240379_at
229759_s_at
206924_at
1562728_at
1558592_at
214450_at
217342_x_at
212353_at
240225_at
1566884_at
230088_at
219768_at
1560630_at
243892_at
230493_at
244793_at
232479_at
239483_at
219403_s_at
226913_s_at
203083_at
232871_at
1566447_at
1567280_at
215526_at
215592_at
1554629_at
224258_at
228836_at
229376_at
244300_at
1553919_at
206012_at
1554286_at
227512_at
1561613_at
229622_at
1565728_at
216752_at
243675_at
206639_x_at
236481_at
207720_at
229551_x_at
226346_at
230460_at
238665_at
240507_at
233645_s_at
232915_at
213183_s_at
236099_at
211541_s_at
1557914_s_at
230842_at
1552870_s_at
204713_s_at
220098_at
243587_x_at
1552531_a_at
201417_at
1556344_at
1560425_s_at
237066_at
1569023_a_at
215272_at
1561197_at
207909_x_at
1555084_at
1553165_at
231349_at
223623_at
1566487_at
212865_s_at
217395_at
1563927_a_at
235856_at
209266_s_at
228144_at
228783_at
241487_at
205137_x_at
1570279_at
213553_x_at
233311_at
228601_at
227532_at
240479_at
1564525_at
1569721_at
230502_s_at
240313_at
237791_at
201787_at
237833_s_at
232445_at
205848_at
244488_at
223987_at
235911_at
238548_at
241013_at
210335_at
209632_at
234009_at
243382_at
230038_at
228654_at
1558727_at
240389_at
1569536_at
214622_at
219208_at
229953_x_at
218591_s_at
203397_s_at
205821_at
234489_at
1557395_at
235042_at
225162_at
215180_at
204680_s_at
210599_at
234112_at
202094_at
234683_at
228602_at
207841_at
239723_at
226811_at
208063_s_at
201843_s_at
209589_s_at
230258_at
228918_at
235522_at
242322_at
203304_at
205547_s_at
202133_at
203592_s_at
1569571_at
202555_s_at
223699_at
1553443_at
220830_at
238076_at
238834_at
1570038_at
236650_at
237244_at
239496_at
214725_at
210612_s_at
229930_at
1568779_a_at
233887_at
1568749_at
233142_at
244123_at
208451_s_at
1555691_a_at
225238_at
1565320_at
235651_at
237446_at
239298_at
239310_at
215200_x_at
237087_at
214428_x_at
221019_s_at
236565_s_at
232701_at
223791_at
230087_at
1556817_a_at
222298_at
244696_at
213348_at
218717_s_at
1570116_at
1559031_at
205491_s_at
239777_at
214051_at
206694_at
236449_at
1563943_at
236071_at
209633_at
206671_at
1560002_at
231132_at
240081_at
239304_at
1555724_s_at
236158_at
207420_at
216799_at
207876_s_at
227875_at
232040_at
207989_at
1562688_at
236791_at
1559067_a_at
1558368_s_at
215889_at
1565576_at
205444_at
201842_s_at
242162_at
221390_s_at
1553722_s_at
1554173_at
230233_at
211677_x_at
243884_at
1560475_at
1569958_at
222213_x_at
240317_at
206558_at
237254_at
206508_at
1554332_a_at
1565803_at
231214_at
236687_at
232822_x_at
237683_s_at
239624_at
227173_s_at
220272_at
213752_at
237185_at
237671_at
242839_at
243745_at
212172_at
234204_at
208998_at
1557007_a_at
1569815_x_at
244376_at
216030_s_at
1563303_at
241216_at
222925_at
224100_s_at
232384_s_at
244441_at
1566475_at
216982_x_at
216894_x_at
232059_at
210319_x_at
219654_at
225283_at
228124_at
239443_at
243636_s_at
222433_at
1555842_at
238269_at
209588_at
212320_at
202132_at
215818_at
223144_s_at
230166_at
211753_s_at
241156_at
244544_at
216998_s_at
206556_at
1552419_s_at
1556134_a_at
242800_at
206027_at
1569181_x_at
216704_at
240650_at
220988_s_at
234475_x_at
230369_at
223854_at
220745_at
1558950_at
242652_at
220451_s_at
1557080_s_at
221524_s_at
1569180_at
237706_at
223503_at
230534_at
1556269_at
228656_at
219416_at
220391_at
1558449_at
233809_at
236181_at
222101_s_at
229538_s_at
217449_at
205132_at
1559780_at
218368_s_at
221828_s_at
221401_at
1561394_s_at
232298_at
1562914_a_at
203228_at
205139_s_at
212812_at
236242_at
237302_at
225723_at
225630_at
202876_s_at
1553277_at
235720_at
236109_at
211197_s_at
226599_at
243144_at
1552626_a_at
226081_at
201860_s_at
1556460_a_at
219912_s_at
229978_at
230090_at
234875_at
214220_s_at
215537_x_at
218211_s_at
203212_s_at
1559133_at
1561252_at
232270_at
241933_at
1561045_a_at
1553123_at
1553329_at
209789_at
204328_at
230588_s_at
211992_at
204197_s_at
229613_at
241002_at
1557458_s_at
212762_s_at
243671_at
230490_x_at
232576_at
241030_at
244401_at
210187_at
214023_x_at
52975_at
219028_at
41386_i_at
233100_at
207183_at
227250_at
1562030_at
1553815_a_at
229888_at
224074_at
232978_at
224906_at
212954_at
1552946_at
230278_at
213199_at
228433_at
205956_x_at
220952_s_at
202262_x_at
1553524_at
208713_at
219034_at
223358_s_at
236757_at
220161_s_at
226177_at
234827_at
1555963_x_at
32094_at
212451_at
211714_x_at
35617_at
220823_at
1557541_at
203986_at
207480_s_at
1555468_at
226839_at
226730_s_at
229861_at
230433_at
238468_at
208628_s_at
221744_at
1562591_a_at
214167_s_at
209675_s_at
1552797_s_at
209340_at
231270_at
223134_at
1554017_at
203288_at
232039_at
200733_s_at
236980_at
219187_at
229743_at
223792_at
225896_at
227025_at
226380_at
205042_at
209043_at
209518_at
202405_at
218173_s_at
225083_at
201025_at
214221_at
201305_x_at
205379_at
219053_s_at
222777_s_at
202123_s_at
204091_at
222621_at
1557121_s_at
203430_at
