# Supplementary material for: T Cells Enhance Stem-Like Properties and Conditional Malignancy in Gliomas
Source: PLoS One. 2010 Jun 7;5(6):e10974. doi: 10.1371/journal.pone.0010974 (PMC2881867; doi:10.1371/journal.pone.0010974)
Supplement: Table S2 — Probesets for mouse GL26 analysis. Entire lists of 1293 vaccine-altered, 158 EGFR- and SHH-related, 136 cytokine/immune modulator, and 763 progenitor cell/differentiation probesets (MG480+2 chip) used in microarray analyses in Figures 1, 6, S1, S2, S3, S4, and S6, can be found in Table S2. (0.11 MB XLS) [file pone.0010974.s006.xls]

## Sheet: Sheet1
Vaccine-altered ms	Egfr-, Shh-related	cytokine/immune Modulators	Progenitor/differentiation
1415835_at	1416657_at	1415744_at	1415825_s_at
1415897_a_at	1425711_a_at	1416415_a_at	1415880_a_at
1415898_at	1440950_at	1416746_at	1415907_at
1415904_at	1442759_at	1417025_at	1415931_at
1415931_at	1422938_at	1418126_at	1416039_x_at
1415959_at	1427818_at	1418162_at	1416072_at
1416063_x_at	1437122_at	1418163_at	1416081_at
1416164_at	1440770_at	1418638_at	1416101_a_at
1416318_at	1443837_x_at	1418803_a_at	1416122_at
1416405_at	1457687_at	1418946_at	1416123_at
1416711_at	1426334_a_at	1419132_at	1416124_at
1416717_at	1435448_at	1419297_at	1416172_at
1416828_at	1435449_at	1419532_at	1416173_at
1416926_at	1456005_a_at	1419714_at	1416307_at
1417036_at	1456006_at	1419744_at	1416385_a_at
1417185_at	1459794_at	1419848_x_at	1416386_a_at
1417338_at	1424278_a_at	1420653_at	1416488_at
1417411_at	1423760_at	1420893_a_at	1416558_at
1417532_at	1434376_at	1420894_at	1416564_at
1417552_at	1443265_at	1420895_at	1416572_at
1417561_at	1452483_a_at	1421268_at	1416581_at
1417589_at	1424932_at	1421269_at	1416589_at
1417597_at	1432647_at	1421352_at	1416594_at
1417607_at	1435888_at	1421358_at	1416657_at
1417634_at	1451530_at	1421612_a_at	1416658_at
1417641_at	1454313_at	1421613_at	1416728_at
1417960_at	1457563_at	1421890_at	1416896_at
1417977_at	1460420_a_at	1421891_at	1416953_at
1417978_at	1425015_at	1422010_at	1416967_at
1418126_at	1425016_at	1422019_at	1417047_at
1418155_at	1442471_at	1422083_at	1417048_at
1418165_at	1445417_at	1422160_at	1417068_a_at
1418299_at	1454022_at	1422405_at	1417086_at
1418426_at	1423100_at	1422527_at	1417175_at
1418475_at	1419905_s_at	1422553_at	1417176_at
1418478_at	1419906_at	1422781_at	1417207_at
1418480_at	1418045_at	1422782_s_at	1417226_at
1418547_at	1417409_at	1422891_at	1417270_at
1418582_at	1448694_at	1422892_s_at	1417301_at
1418603_at	1419568_at	1423250_a_at	1417312_at
1418615_at	1426585_s_at	1424272_at	1417409_at
1418641_at	1442876_at	1424572_a_at	1417410_s_at
1418748_at	1453104_at	1424771_at	1417419_at
1418759_at	1421925_at	1424772_at	1417420_at
1418786_at	1421926_at	1424948_x_at	1417487_at
1418811_at	1427060_at	1425137_a_at	1417488_at
1418867_at	1420931_at	1425336_x_at	1417933_at
1418909_at	1420932_at	1425444_a_at	1418085_at
1418939_at	1437045_at	1425477_x_at	1418114_at
1418945_at	1440856_at	1425545_x_at	1418208_at
1418957_at	1457936_at	1425614_x_at	1418237_s_at
1418994_at	1417656_at	1425620_at	1418281_at
1419009_at	1454946_at	1426202_at	1418349_at
1419017_at	1427705_a_at	1426324_at	1418350_at
1419020_at	1442949_at	1426363_x_at	1418420_at
1419065_at	1425902_a_at	1426397_at	1418532_at
1419148_at	1429128_x_at	1426587_a_at	1418533_s_at
1419151_at	1421023_at	1427651_x_at	1418577_at
1419167_at	1425862_a_at	1427746_x_at	1418633_at
1419210_at	1443655_s_at	1428029_a_at	1418634_at
1419233_x_at	1421704_a_at	1430695_at	1418761_at
1419247_at	1423144_at	1430802_at	1418889_a_at
1419331_at	1429434_at	1433795_at	1418910_at
1419339_at	1429435_x_at	1435133_at	1418918_at
1419349_a_at	1440054_at	1435290_x_at	1419015_at
1419376_at	1453134_at	1436596_at	1419017_at
1419467_at	1460326_at	1437367_at	1419034_at
1419475_a_at	1445731_at	1438091_a_at	1419035_s_at
1419529_at	1453069_at	1438092_x_at	1419036_at
1419535_at	1422991_at	1438303_at	1419037_at
1419591_at	1422992_s_at	1438858_x_at	1419038_a_at
1419606_a_at	1443798_at	1439121_at	1419060_at
1419632_at	1453281_at	1439863_at	1419091_a_at
1419697_at	1458321_at	1440041_at	1419155_a_at
1419720_at	1422707_at	1440252_at	1419156_at
1419767_at	1422708_at	1440837_at	1419157_at
1419973_at	1418463_at	1441370_at	1419271_at
1419987_at	1453984_at	1441593_at	1419301_at
1420015_s_at	1426208_x_at	1442332_at	1419417_at
1420082_at	1438588_at	1442827_at	1419519_at
1420180_at	1450533_a_at	1443115_at	1419607_at
1420200_at	1435149_at	1443686_at	1419616_at
1420202_at	1450360_at	1443687_x_at	1419654_at
1420210_at	1422853_at	1443783_x_at	1419655_at
1420228_at	1422854_at	1444008_at	1419700_a_at
1420246_at	1423240_at	1444325_at	1419708_at
1420268_x_at	1450918_s_at	1445360_at	1419935_s_at
1420290_at	1424272_at	1445915_at	1419936_at
1420305_at	1426587_a_at	1446141_at	1420005_s_at
1420313_x_at	1459961_a_at	1446946_at	1420006_at
1420359_at	1460700_at	1447241_at	1420087_at
1420392_at	1419015_at	1447260_at	1420112_at
1420418_at	1415931_at	1447314_at	1420360_at
1420591_at	1416594_at	1448950_at	1420389_at
1420601_at	1417155_at	1449049_at	1420444_at
1420627_a_at	1417493_at	1449235_at	1420457_at
1420692_at	1418376_at	1449556_at	1420512_at
1420698_at	1419519_at	1449580_s_at	1420539_a_at
1420742_at	1420020_at	1449640_at	1420564_at
1420747_at	1420021_s_at	1449875_s_at	1420595_at
1420799_at	1420022_s_at	1450170_x_at	1420619_a_at
1420903_at	1421452_at	1450242_at	1420653_at
1420962_at	1422346_at	1450267_at	1420752_at
1421008_at	1424111_at	1450307_x_at	1420844_at
1421045_at	1424112_at	1450529_at	1420956_at
1421103_at	1424755_at	1450531_at	1420957_at
1421125_at	1424756_at	1450582_at	1421047_at
1421200_at	1425822_a_at	1450587_at	1421103_at
1421243_at	1425922_a_at	1450648_s_at	1421105_at
1421280_at	1425923_at	1450655_at	1421106_at
1421297_a_at	1426565_at	1450922_a_at	1421157_at
1421303_at	1427048_at	1450923_at	1421234_at
1421381_a_at	1427049_s_at	1451593_at	1421239_at
1421405_at	1427253_s_at	1451644_a_at	1421245_at
1421437_x_at	1427571_at	1451721_a_at	1421246_at
1421452_at	1428136_at	1451784_x_at	1421247_at
1421473_at	1432017_at	1451931_x_at	1421282_at
1421571_a_at	1432230_at	1451934_at	1421283_at
1421599_at	1434557_at	1452431_s_at	1421299_a_at
1421623_at	1434795_at	1452544_x_at	1421341_at
1421625_a_at	1434957_at	1452547_s_at	1421365_at
1421638_at	1435132_at	1452548_x_at	1421380_at
1421658_x_at	1436497_at	1454722_at	1421387_at
1421691_at	1436869_at	1454987_a_at	1421439_at
1421693_a_at	1437219_at	1455728_at	1421450_a_at
1421698_a_at	1437401_at	1456032_x_at	1421465_at
1421707_at	1438620_x_at	1457108_at	1421546_a_at
1421714_at	1440288_at	1457493_at	1421657_a_at
1421755_at	1440979_at	1458607_at	1421720_a_at
1421759_a_at	1442215_at	1459355_at	1421740_at
1421774_at	1443566_at	1459777_at	1421763_at
1421779_at	1444043_at	1459872_x_at	1421765_at
1421808_at	1444873_at	1459961_a_at	1421821_at
1422025_at	1445600_at	1460251_at	1421826_at
1422052_at	1445664_at	1460418_x_at	1421827_at
1422065_at	1445966_at	1460700_at	1421832_at
1422132_at	1446086_s_at		1421876_at
1422165_at	1446303_at		1421877_at
1422167_at	1448152_at		1421878_at
1422194_at	1448395_at		1421955_a_at
1422196_at	1448733_at		1421964_at
1422203_at	1449058_at		1421965_s_at
1422214_at	1449661_at		1421991_a_at
1422221_at	1450525_at		1421992_a_at
1422245_a_at	1450704_at		1422025_at
1422266_at	1451882_a_at		1422037_at
1422344_s_at	1452014_a_at		1422079_at
1422351_at	1452364_at		1422129_at
1422363_at	1455122_at		1422138_at
1422382_at	1455154_at		1422139_at
1422384_at	1455790_at		1422168_a_at
1422392_at	1456067_at		1422169_a_at
1422411_s_at	1457356_at		1422173_at
1422419_s_at	1458127_at		1422174_at
1422640_at	1458574_at		1422205_at
1422641_at	1458643_at		1422228_at
1422644_at	1459211_at		1422300_at
1422682_s_at	1460187_at		1422313_a_at
1422720_at			1422553_at
1422813_at			1422582_at
1423008_at			1422602_a_at
1423016_a_at			1422751_at
1423135_at			1422803_at
1423259_at			1422826_at
1423379_at			1422847_a_at
1423413_at			1422872_at
1423414_at			1422912_at
1423603_at			1422936_at
1423619_at			1422937_at
1423867_at			1422941_at
1424037_at			1422946_a_at
1424127_at			1422949_at
1424186_at			1422950_at
1424303_at			1422977_at
1424374_at			1422985_at
1424375_s_at			1423023_at
1424401_at			1423027_at
1424454_at			1423062_at
1424477_at			1423104_at
1424494_s_at			1423144_at
1424556_at			1423176_at
1424866_at			1423274_at
1424975_at			1423275_at
1425083_at			1423348_at
1425090_s_at			1423367_at
1425127_at			1423377_at
1425128_at			1423428_at
1425146_at			1423442_a_at
1425164_a_at			1423478_at
1425214_at			1423500_a_at
1425229_a_at			1423584_at
1425247_a_at			1423585_at
1425298_a_at			1423635_at
1425314_at			1423671_at
1425325_at			1423753_at
1425353_at			1423756_s_at
1425379_at			1423757_x_at
1425393_a_at			1423760_at
1425662_at			1423902_s_at
1425688_a_at			1424027_at
1425712_at			1424111_at
1425744_a_at			1424112_at
1425746_at			1424272_at
1425790_a_at			1424797_a_at
1425812_a_at			1424827_a_at
1425816_at			1424884_at
1425828_at			1424919_at
1425871_a_at			1424932_at
1425878_at			1424942_a_at
1425888_at			1424950_at
1425890_at			1424985_a_at
1425897_at			1424986_s_at
1426001_at			1425229_a_at
1426003_at			1425357_a_at
1426006_at			1425369_a_at
1426026_at			1425377_at
1426032_at			1425425_a_at
1426038_at			1425447_at
1426058_a_at			1425457_a_at
1426064_at			1425458_a_at
1426096_at			1425465_a_at
1426099_at			1425466_at
1426103_a_at			1425491_at
1426108_s_at			1425492_at
1426126_a_at			1425493_at
1426127_x_at			1425494_s_at
1426131_at			1425542_a_at
1426147_s_at			1425650_at
1426173_at			1425711_a_at
1426255_at			1425725_s_at
1426309_at			1425726_x_at
1426432_a_at			1425822_a_at
1426664_x_at			1425889_at
1426729_at			1425960_s_at
1426785_s_at			1426018_a_at
1427054_s_at			1426044_a_at
1427137_at			1426073_at
1427191_at			1426085_a_at
1427238_at			1426091_a_at
1427265_at			1426179_a_at
1427298_at			1426209_at
1427306_at			1426238_at
1427329_a_at			1426251_at
1427377_x_at			1426388_s_at
1427392_at			1426430_at
1427410_at			1426431_at
1427420_at			1426559_at
1427458_at			1426565_at
1427474_s_at			1426587_a_at
1427588_a_at			1426637_a_at
1427614_at			1426638_at
1427625_a_at			1426639_a_at
1427641_at			1426769_s_at
1427668_at			1426851_a_at
1427697_a_at			1426852_x_at
1427735_a_at			1426955_at
1427750_at			1426966_at
1427768_s_at			1426967_at
1427789_s_at			1427003_at
1427839_at			1427048_at
1427849_a_at			1427049_s_at
1427850_x_at			1427166_a_at
1427873_at			1427299_at
1427942_at			1427394_at
1427963_s_at			1427457_a_at
1428025_s_at			1427458_at
1428037_at			1427523_at
1428303_at			1427529_at
1428376_at			1427562_a_at
1428434_at			1427582_at
1428435_at			1427593_at
1428492_at			1427609_at
1428571_at			1427641_at
1428590_at			1427677_a_at
1428669_at			1427703_at
1428895_at			1427783_at
1428960_at			1427789_s_at
1428981_at			1428136_at
1429236_at			1428158_at
1429287_a_at			1428461_at
1429289_at			1428462_at
1429300_at			1428463_a_at
1429366_at			1428537_at
1429380_at			1428806_at
1429511_at			1429051_s_at
1429525_s_at			1429177_x_at
1429548_at			1429301_at
1429626_at			1429302_at
1429673_at			1429312_s_at
1429677_at			1429313_at
1429685_at			1429372_at
1429717_at			1429427_s_at
1429742_at			1429428_at
1429791_at			1429434_at
1429813_at			1429435_x_at
1429832_at			1429514_at
1429855_at			1430127_a_at
1429858_at			1430164_a_at
1429865_at			1430335_a_at
1429868_at			1430384_at
1429922_at			1430408_at
1429936_at			1430529_at
1429944_at			1430669_at
1429972_s_at			1430775_at
1429982_at			1430809_at
1429994_s_at			1431091_at
1430027_at			1431225_at
1430084_at			1431748_a_at
1430090_at			1431947_at
1430104_at			1432189_a_at
1430118_at			1432190_at
1430166_at			1432410_a_at
1430176_at			1432411_a_at
1430210_at			1432495_at
1430212_at			1432647_at
1430217_at			1433471_at
1430222_at			1433552_a_at
1430233_a_at			1433641_at
1430320_at			1433814_at
1430330_at			1433889_at
1430400_at			1434033_at
1430401_at			1434070_at
1430414_at			1434154_at
1430467_at			1434205_at
1430470_at			1434206_s_at
1430477_s_at			1434248_at
1430493_at			1434310_at
1430638_at			1434376_at
1430649_at			1434432_at
1430667_at			1434439_at
1430690_at			1434458_at
1430711_at			1434606_at
1430720_at			1434612_s_at
1430730_at			1434740_at
1430737_at			1434745_at
1430828_at			1434831_a_at
1430861_at			1434832_at
1430870_at			1434918_at
1430879_at			1435051_at
1430894_at			1435122_x_at
1430913_at			1435192_at
1430917_at			1435199_at
1430921_at			1435373_at
1430928_at			1435438_at
1430952_at			1435472_at
1430960_at			1435543_at
1431021_at			1435762_at
1431043_at			1435888_at
1431102_at			1435980_x_at
1431104_at			1436067_at
1431151_at			1436068_at
1431225_at			1436075_at
1431242_at			1436089_at
1431253_s_at			1436207_at
1431276_at			1436240_at
1431308_at			1436244_a_at
1431318_at			1436398_at
1431371_at			1436487_x_at
1431379_a_at			1436497_at
1431451_at			1436790_a_at
1431459_at			1436791_at
1431461_at			1436812_at
1431466_at			1436845_at
1431526_at			1436901_at
1431540_at			1436978_at
1431570_at			1436994_a_at
1431617_at			1437001_at
1431651_at			1437059_at
1431668_at			1437195_x_at
1431673_at			1437219_at
1431680_a_at			1437284_at
1431682_at			1437301_a_at
1431710_at			1437303_at
1431729_at			1437312_at
1431793_at			1437351_at
1431854_a_at			1437401_at
1431863_at			1437405_a_at
1431867_a_at			1437406_x_at
1431868_at			1437419_at
1431912_at			1437536_at
1431944_at			1437584_at
1431984_at			1437628_s_at
1432010_at			1437690_x_at
1432017_at			1437691_at
1432018_at			1437692_x_at
1432039_a_at			1437736_at
1432087_at			1437804_at
1432088_at			1437816_at
1432092_a_at			1437860_at
1432113_at			1437861_s_at
1432121_a_at			1438101_at
1432124_at			1438115_a_at
1432132_at			1438116_x_at
1432133_at			1438131_at
1432135_s_at			1438133_a_at
1432139_at			1438203_at
1432175_at			1438204_at
1432185_a_at			1438218_at
1432196_a_at			1438246_at
1432214_at			1438304_at
1432228_at			1438406_at
1432229_a_at			1438414_at
1432240_at			1438483_at
1432242_at			1438620_x_at
1432326_at			1438670_at
1432327_at			1438679_at
1432336_at			1438848_at
1432342_at			1438981_at
1432345_at			1439373_x_at
1432379_at			1439401_x_at
1432401_a_at			1439414_x_at
1432420_a_at			1439429_x_at
1432446_at			1439532_s_at
1432455_a_at			1439598_at
1432500_at			1439656_at
1432507_at			1439754_at
1432514_at			1439766_x_at
1432518_at			1439837_at
1432554_at			1439931_at
1432560_at			1439949_at
1432580_at			1440014_at
1432599_at			1440047_at
1432666_at			1440054_at
1432669_at			1440182_at
1432677_at			1440509_at
1432697_at			1440578_at
1432714_at			1440706_at
1432720_at			1440739_at
1432737_at			1440760_at
1432750_at			1440827_x_at
1432760_at			1440844_at
1432770_at			1440935_at
1432783_at			1440950_at
1432788_at			1440979_at
1432794_at			1441029_at
1432834_at			1441360_at
1432858_at			1441404_at
1432880_at			1441593_at
1432891_at			1441620_at
1432904_at			1441652_at
1432913_at			1441697_at
1432919_at			1441743_at
1432943_at			1441756_at
1433020_at			1441889_x_at
1433030_at			1442067_at
1433047_at			1442215_at
1433055_at			1442252_at
1433058_at			1442256_at
1433059_at			1442340_x_at
1433061_at			1442567_at
1433085_at			1442609_at
1433099_at			1442674_at
1433114_at			1442759_at
1433120_at			1442849_at
1433206_at			1443007_at
1433233_at			1443069_at
1433240_at			1443128_at
1433256_at			1443144_at
1433286_at			1443197_at
1433300_at			1443240_at
1433335_at			1443265_at
1433344_at			1443300_at
1433370_at			1443375_at
1433381_at			1443463_at
1433393_at			1443533_at
1433424_at			1443566_at
1433577_at			1443591_at
1433657_at			1443720_s_at
1433720_s_at			1443881_at
1433743_at			1443949_at
1433792_at			1444044_at
1433815_at			1444125_at
1433919_at			1444226_at
1433948_at			1444323_at
1433949_x_at			1444325_at
1433959_at			1444378_at
1434028_at			1444455_at
1434152_at			1444470_x_at
1434425_at			1444596_at
1434449_at			1444649_at
1434504_at			1444767_at
1434505_a_at			1444828_at
1434537_at			1444964_at
1434595_at			1445028_at
1434639_at			1445045_at
1434640_at			1445252_at
1434735_at			1445360_at
1434785_at			1445395_at
1434912_at			1445413_at
1434974_at			1445600_at
1434984_at			1445637_at
1435053_s_at			1445664_at
1435115_at			1445788_at
1435210_s_at			1445815_at
1435286_at			1445859_at
1435392_at			1445966_at
1435408_at			1446007_at
1435435_at			1446026_at
1435507_x_at			1446211_at
1435516_x_at			1446275_at
1435611_x_at			1446303_at
1435685_x_at			1446356_at
1435752_s_at			1446436_at
1435805_at			1446452_at
1435828_at			1446461_at
1435839_at			1446525_at
1435866_s_at			1446561_at
1435915_at			1446567_at
1435941_at			1446598_at
1436040_at			1446628_at
1436043_at			1446767_at
1436163_at			1446780_at
1436205_at			1446850_at
1436262_x_at			1446921_at
1436274_at			1446965_at
1436276_at			1447026_at
1436279_at			1447043_at
1436374_x_at			1447071_at
1436423_at			1447074_at
1436453_at			1447400_at
1436576_at			1447434_at
1436593_at			1447644_at
1436656_at			1447647_at
1436685_at			1447655_x_at
1436742_a_at			1447667_x_at
1436776_x_at			1447675_x_at
1436789_at			1447853_x_at
1436968_x_at			1447877_x_at
1436990_s_at			1448074_at
1436996_x_at			1448152_at
1437094_x_at			1448201_at
1437136_at			1448208_at
1437140_at			1448229_s_at
1437150_at			1448342_at
1437272_at			1448364_at
1437306_at			1448383_at
1437326_x_at			1448389_at
1437328_x_at			1448392_at
1437332_at			1448395_at
1437347_at			1448424_at
1437397_at			1448578_at
1437467_at			1448593_at
1437614_x_at			1448594_at
1437631_at			1448616_at
1437640_at			1448646_at
1437721_at			1448655_at
1437726_x_at			1448662_at
1437786_at			1448669_at
1437854_at			1448694_at
1437930_at			1448695_at
1437937_at			1448698_at
1437952_at			1448727_at
1437968_at			1448818_at
1438068_at			1448877_at
1438113_at			1448896_at
1438193_at			1448908_at
1438228_at			1448957_at
1438284_at			1449005_at
1438290_x_at			1449135_at
1438305_at			1449146_at
1438313_at			1449210_at
1438358_x_at			1449340_at
1438394_x_at			1449359_at
1438395_at			1449370_at
1438466_at			1449416_at
1438486_at			1449425_at
1438577_at			1449470_at
1438596_at			1449528_at
1438612_a_at			1449554_at
1438614_x_at			1449692_at
1438632_x_at			1449730_s_at
1438658_a_at			1449737_at
1438659_x_at			1449814_at
1438779_at			1449863_a_at
1438858_x_at			1449873_at
1438968_x_at			1449932_at
1438970_x_at			1449939_s_at
1438982_s_at			1449956_at
1439026_at			1450021_at
1439042_at			1450043_at
1439064_at			1450044_at
1439118_at			1450056_at
1439294_at			1450117_at
1439361_at			1450135_at
1439372_at			1450137_at
1439373_x_at			1450179_at
1439412_at			1450186_s_at
1439499_at			1450191_a_at
1439505_at			1450210_at
1439518_at			1450225_at
1439528_at			1450236_at
1439557_s_at			1450253_a_at
1439573_at			1450342_at
1439594_at			1450383_at
1439609_at			1450388_s_at
1439612_at			1450431_a_at
1439653_at			1450446_a_at
1439694_at			1450461_at
1439718_at			1450475_at
1439762_x_at			1450482_a_at
1439777_at			1450485_at
1439879_at			1450497_at
1439902_at			1450510_a_at
1439913_at			1450511_at
1439933_at			1450628_at
1439934_at			1450655_at
1440009_at			1450759_at
1440043_at			1450763_x_at
1440053_at			1450772_at
1440087_at			1450782_at
1440097_at			1450834_at
1440113_at			1450853_at
1440145_at			1450945_at
1440155_at			1450960_at
1440170_at			1450978_at
1440189_at			1450982_at
1440209_at			1450990_at
1440334_at			1451014_at
1440355_at			1451020_at
1440367_at			1451022_at
1440386_at			1451031_at
1440420_at			1451109_a_at
1440445_at			1451159_at
1440491_at			1451310_a_at
1440523_at			1451358_a_at
1440692_at			1451436_at
1440697_at			1451497_at
1440698_at			1451524_at
1440728_at			1451530_at
1440773_at			1451538_at
1440828_x_at			1451558_at
1440923_at			1451574_at
1440967_at			1451598_at
1441019_at			1451689_a_at
1441025_at			1451711_at
1441093_at			1451717_s_at
1441102_at			1451729_at
1441120_at			1451789_a_at
1441165_s_at			1451835_at
1441244_at			1451856_at
1441250_at			1451873_a_at
1441296_at			1451889_at
1441302_at			1451890_at
1441378_at			1452014_a_at
1441379_at			1452017_at
1441402_at			1452024_a_at
1441422_at			1452114_s_at
1441439_at			1452188_at
1441453_at			1452357_at
1441478_at			1452383_at
1441481_at			1452482_at
1441531_at			1452483_a_at
1441559_at			1452507_at
1441569_at			1452510_at
1441598_at			1452511_at
1441605_at			1452526_a_at
1441610_at			1452684_at
1441626_at			1452788_at
1441651_at			1452843_at
1441687_at			1452878_at
1441697_at			1453002_at
1441713_at			1453097_a_at
1441729_at			1453099_at
1441752_at			1453100_at
1441785_at			1453125_at
1441786_at			1453134_at
1441809_at			1453413_at
1441812_at			1453427_at
1441847_at			1453853_a_at
1441925_at			1453867_at
1441926_x_at			1454159_a_at
1442026_at			1454313_at
1442045_at			1454722_at
1442121_at			1454896_at
1442183_at			1454902_at
1442211_at			1454958_at
1442225_at			1455026_at
1442301_at			1455214_at
1442322_at			1455220_at
1442325_at			1455223_at
1442327_at			1455231_s_at
1442349_at			1455327_at
1442370_at			1455490_at
1442374_at			1455556_at
1442417_at			1455562_at
1442444_at			1455565_at
1442450_at			1455689_at
1442491_at			1455728_at
1442527_at			1455746_at
1442529_at			1455843_at
1442534_at			1455851_at
1442566_at			1455867_at
1442593_at			1455956_x_at
1442618_at			1456135_s_at
1442657_at			1456216_at
1442680_at			1456263_at
1442703_at			1456323_at
1442715_at			1456342_at
1442720_at			1456379_x_at
1442741_at			1456427_at
1442758_at			1456524_at
1442778_at			1456627_at
1442797_x_at			1456727_a_at
1442848_at			1456811_at
1442860_at			1456882_at
1442870_at			1456947_at
1442895_at			1456976_at
1442922_at			1457356_at
1442976_at			1457413_at
1443001_at			1457472_at
1443024_at			1457493_at
1443028_at			1457509_at
1443036_at			1457549_at
1443037_at			1457563_at
1443067_at			1457724_at
1443089_at			1457823_at
1443117_at			1458002_at
1443122_at			1458062_at
1443125_at			1458204_at
1443131_at			1458232_at
1443137_at			1458268_s_at
1443147_at			1458279_at
1443169_at			1458312_at
1443209_at			1458332_x_at
1443240_at			1458334_at
1443272_at			1458370_at
1443274_at			1458451_at
1443278_at			1458512_at
1443283_at			1458513_at
1443305_at			1458626_at
1443386_at			1458643_at
1443473_at			1458695_at
1443496_at			1458904_at
1443514_at			1458960_at
1443555_at			1459148_at
1443608_at			1459188_at
1443616_at			1459261_at
1443637_at			1459403_at
1443651_at			1459674_at
1443661_at			1459707_at
1443670_at			1459762_x_at
1443686_at			1459800_s_at
1443703_at			1459825_x_at
1443746_x_at			1459832_s_at
1443748_x_at			1459843_s_at
1443754_x_at			1459916_at
1443783_x_at			1459947_at
1443784_at			1459961_a_at
1443827_x_at			1459996_at
1443834_at			1460096_at
1443912_at			1460187_at
1443971_x_at			1460199_a_at
1443974_at			1460237_at
1443997_at			1460250_at
1444053_at			1460295_s_at
1444074_at			1460304_a_at
1444077_at			1460326_at
1444081_at			1460419_a_at
1444095_a_at			1460420_a_at
1444098_at			1460444_at
1444102_at			1460646_at
1444132_at			1460657_at
1444145_at			1460700_at
1444210_at
1444254_at
1444270_at
1444284_at
1444285_at
1444311_at
1444315_at
1444321_at
1444332_at
1444338_at
1444362_at
1444368_at
1444398_at
1444462_at
1444471_at
1444480_at
1444510_at
1444536_at
1444573_at
1444586_at
1444596_at
1444597_at
1444610_at
1444696_at
1444713_at
1444751_at
1444778_at
1444792_at
1444815_at
1444819_at
1444839_at
1444846_at
1444881_at
1444918_at
1444920_at
1444922_at
1444994_at
1445057_at
1445058_at
1445084_at
1445123_at
1445124_at
1445142_at
1445156_at
1445177_at
1445218_at
1445256_at
1445270_at
1445287_at
1445296_at
1445306_at
1445327_at
1445435_at
1445444_at
1445449_at
1445487_at
1445508_at
1445529_at
1445538_at
1445540_at
1445546_at
1445554_at
1445563_at
1445573_at
1445587_at
1445595_at
1445615_at
1445617_at
1445625_at
1445690_at
1445705_x_at
1445734_at
1445735_at
1445741_at
1445756_at
1445766_at
1445814_at
1445818_at
1445838_at
1445863_at
1445871_at
1445903_at
1445915_at
1445938_at
1445943_at
1445948_at
1445958_at
1445961_at
1445990_at
1445994_at
1445996_at
1446038_at
1446063_at
1446064_at
1446069_at
1446072_at
1446077_at
1446097_at
1446232_at
1446233_at
1446242_at
1446247_at
1446273_at
1446282_at
1446343_at
1446348_at
1446373_at
1446392_at
1446402_at
1446414_at
1446441_at
1446449_at
1446469_at
1446494_at
1446522_at
1446531_at
1446537_at
1446539_at
1446552_at
1446576_at
1446578_at
1446589_at
1446633_at
1446642_at
1446684_at
1446690_at
1446699_at
1446794_at
1446816_at
1446823_at
1446857_at
1446865_at
1446925_at
1446930_at
1446960_at
1446984_at
1447030_at
1447058_at
1447076_at
1447113_at
1447134_at
1447144_at
1447158_at
1447233_at
1447287_at
1447301_at
1447325_at
1447345_at
1447361_at
1447369_at
1447436_at
1447474_at
1447496_s_at
1447511_at
1447535_at
1447558_at
1447578_at
1447579_at
1447583_x_at
1447603_x_at
1447613_at
1447617_at
1447626_x_at
1447633_x_at
1447642_x_at
1447699_at
1447702_x_at
1447709_at
1447722_at
1447723_at
1447725_at
1447766_x_at
1447769_x_at
1447789_x_at
1447810_x_at
1447848_at
1447872_at
1447939_a_at
1447997_s_at
1448081_at
1448137_at
1448220_at
1448289_at
1448323_a_at
1448393_at
1448394_at
1448407_at
1448424_at
1448452_at
1448532_at
1448750_at
1448752_at
1448790_at
1448813_at
1448818_at
1448823_at
1448898_at
1448961_at
1448988_at
1449057_at
1449071_at
1449081_at
1449184_at
1449218_at
1449224_at
1449227_at
1449235_at
1449319_at
1449330_at
1449392_at
1449402_at
1449416_at
1449426_a_at
1449450_at
1449479_at
1449497_at
1449529_s_at
1449581_at
1449583_at
1449597_at
1449613_at
1449671_at
1449675_at
1449684_at
1449729_at
1449780_at
1449813_at
1449834_at
1449876_at
1449887_at
1449893_a_at
1449896_at
1449912_at
1449960_at
1449974_at
1449988_at
1450014_at
1450020_at
1450075_at
1450125_at
1450133_at
1450180_a_at
1450202_at
1450219_at
1450237_at
1450245_at
1450278_at
1450279_at
1450283_at
1450360_at
1450398_at
1450411_at
1450476_at
1450570_a_at
1450588_at
1450659_at
1450717_at
1450737_at
1450764_at
1450989_at
1451029_at
1451059_at
1451129_at
1451206_s_at
1451255_at
1451263_a_at
1451270_at
1451280_at
1451342_at
1451344_at
1451538_at
1451584_at
1451606_at
1451677_at
1451691_at
1451711_at
1451767_at
1451771_at
1451808_at
1451813_at
1451876_a_at
1451953_at
1452275_at
1452487_x_at
1452512_a_at
1452520_a_at
1452531_at
1452555_at
1452567_at
1452641_at
1452652_at
1452731_x_at
1452740_at
1452815_at
1452913_at
1452952_at
1453084_s_at
1453093_at
1453103_at
1453121_at
1453138_at
1453154_at
1453225_at
1453259_at
1453279_x_at
1453335_a_at
1453346_at
1453379_at
1453389_a_at
1453432_at
1453477_at
1453493_at
1453519_at
1453528_at
1453549_at
1453575_at
1453599_at
1453658_at
1453669_at
1453705_at
1453812_at
1453873_at
1453889_at
1453979_at
1454063_at
1454071_at
1454076_at
1454108_at
1454121_x_at
1454129_at
1454153_at
1454154_at
1454187_at
1454277_at
1454287_at
1454292_at
1454320_at
1454325_at
1454326_at
1454342_at
1454375_at
1454399_at
1454401_at
1454403_at
1454405_at
1454415_at
1454442_at
1454450_at
1454463_at
1454541_at
1454546_at
1454548_at
1454567_at
1454568_at
1454571_at
1454638_a_at
1454713_s_at
1454762_at
1455023_at
1455098_a_at
1455104_at
1455194_at
1455202_at
1455223_at
1455279_at
1455474_at
1455499_at
1455521_at
1455683_a_at
1455690_at
1455753_at
1455761_at
1455770_at
1455864_at
1455896_a_at
1455923_at
1456031_at
1456132_x_at
1456190_a_at
1456391_at
1456406_at
1456408_x_at
1456517_at
1456524_at
1456535_at
1456560_at
1456749_at
1456750_at
1456771_at
1456813_at
1456814_at
1456851_at
1456852_at
1456970_at
1456982_at
1457004_at
1457016_at
1457080_at
1457101_at
1457109_x_at
1457122_at
1457143_at
1457153_at
1457158_at
1457170_at
1457183_at
1457217_at
1457261_at
1457309_at
1457335_at
1457424_at
1457493_at
1457502_at
1457526_at
1457545_at
1457570_at
1457578_at
1457615_at
1457644_s_at
1457667_x_at
1457668_x_at
1457673_at
1457776_at
1457840_at
1457841_at
1457850_at
1457878_at
1457883_at
1457887_at
1457888_at
1457920_at
1457929_at
1457960_at
1457966_at
1457982_at
1457991_at
1458000_at
1458048_at
1458110_at
1458127_at
1458131_at
1458186_at
1458223_at
1458270_at
1458288_at
1458324_x_at
1458334_at
1458398_at
1458421_at
1458455_at
1458488_at
1458529_at
1458534_at
1458623_at
1458629_at
1458691_at
1458720_at
1458734_at
1458741_at
1458766_at
1458812_at
1458871_at
1458876_at
1458899_at
1458904_at
1458922_at
1458964_at
1459025_at
1459058_at
1459065_at
1459081_at
1459086_at
1459128_at
1459172_at
1459176_at
1459177_at
1459179_at
1459184_at
1459191_at
1459212_at
1459214_at
1459224_at
1459236_at
1459251_at
1459257_at
1459281_at
1459357_at
1459362_at
1459368_at
1459420_at
1459500_at
1459521_at
1459545_at
1459549_at
1459563_x_at
1459570_at
1459594_at
1459605_at
1459653_at
1459742_at
1459758_at
1459784_x_at
1459822_at
1459825_x_at
1459833_x_at
1459838_s_at
1459904_at
1459955_at
1459971_at
1459995_at
1460040_at
1460060_at
1460069_at
1460135_at
1460158_at
1460161_at
1460269_at
1460297_at
1460386_a_at
1460417_at
1460418_x_at
1460470_at
1460476_s_at
1460477_at
1460480_at
1460513_a_at
1460516_at
1460522_at
1460714_at
1460715_x_at
